# Supplementary material for: Stomatin-like protein 2 regulates survivin expression in non-small cell lung cancer cells through β-catenin signaling pathway
Source: PubMed Central journal article supplement (PMC5859036; doi:10.1038/s41419-018-0461-9), 2018-03-19

A.

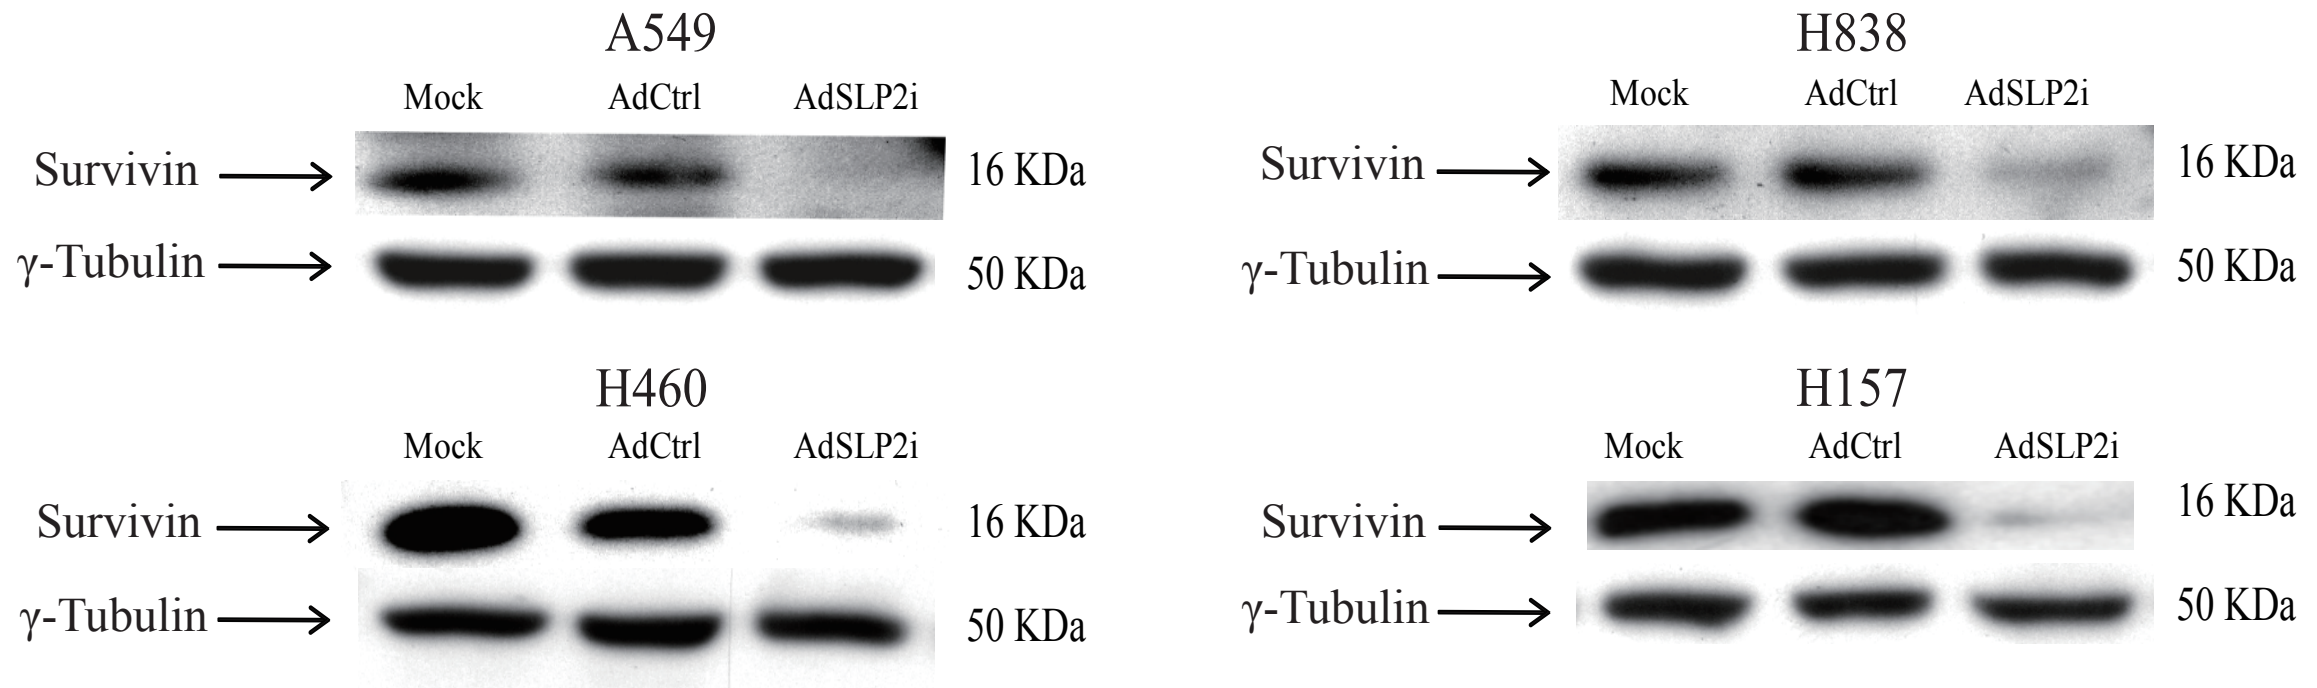

B.

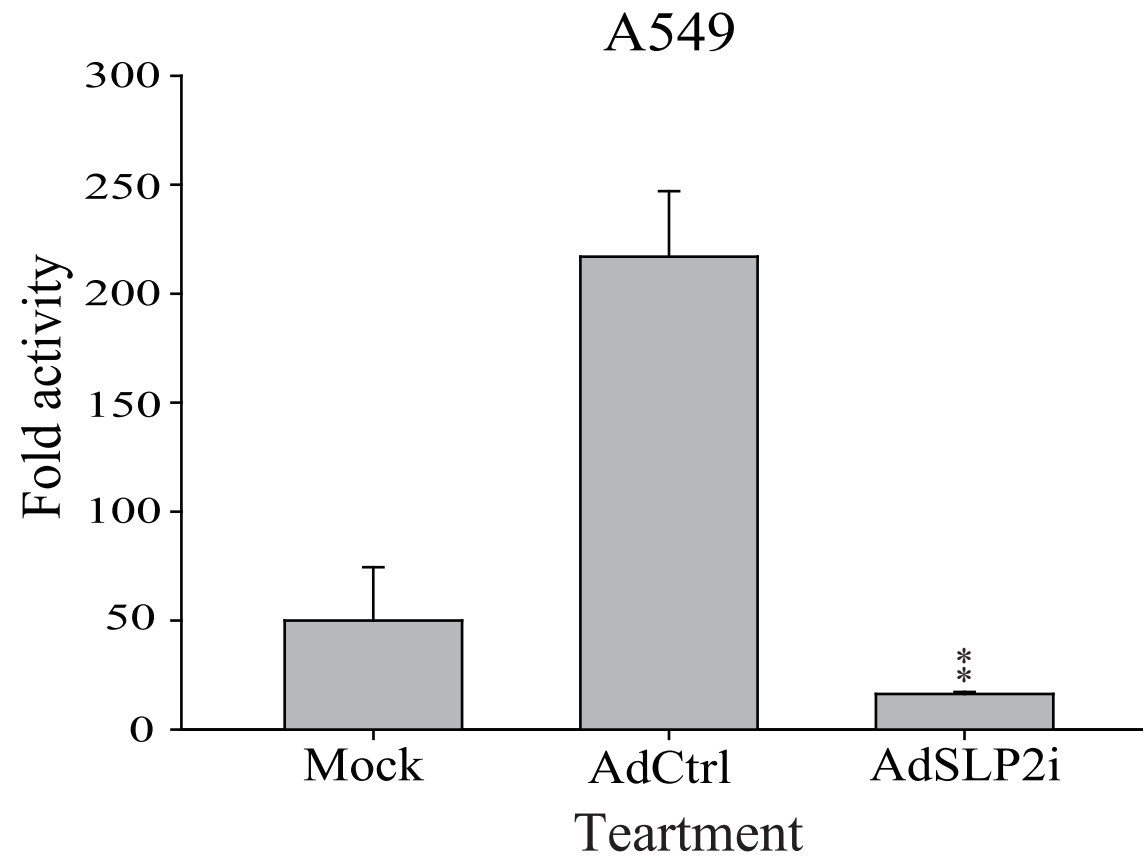

Supplement: 41419_2018_461_MOESM2_ESM.pdf [file 41419_2018_461_MOESM2_ESM.pdf]
